# Detection of Measles Virus RNA in Wastewater: Monitoring for Wild-Type and Vaccine-Derived Strains in a National Preparedness Trial

Warish Ahmed<sup>1</sup>, Metasebia Gebrewold<sup>1</sup>, Rory Verhagen<sup>2</sup> Melissa Koh<sup>3,4</sup>, Jake Gazeley<sup>4</sup>, Avram Levy<sup>4,5</sup>, Stuart Simpson<sup>1</sup>, Monica Nolan<sup>6</sup>

<sup>1</sup>CSIRO Environment, Ecosciences Precinct, 41 Boggo Road, Dutton Park, QLD 4102, Australia

<sup>2</sup>Queensland Alliance for Environmental Health Sciences (QAEHS), The University of Queensland, Woolloongabba, QLD 4102, Australia

<sup>3</sup>School of Biomedical Sciences, University of Western Australia, Nedlands, WA 6009, Australia

<sup>4</sup>Department of Microbiology, PathWest Laboratory Medicine WA

<sup>5</sup>Queen Elizabeth II Medical Centre, Nedlands, Western Australia, Australia

<sup>6</sup>Promoting Health4All Pty Ltd, Bundoora, Victoria, Australia.

**\*Corresponding author.** Warish Ahmed. Mailing address: Ecosciences Precinct, 41 Boggo Road, Dutton Park 4102, Queensland, Australia. Tel.: +617 3833 5582; E-mail address:

[Warish.Ahmed@csiro.au](mailto:Warish.Ahmed@csiro.au)

## Withdrawal statement

The authors have withdrawn this manuscript as appropriate permission from the sample providers was not obtained prior to submission. This oversight was unintentional, and we sincerely apologise for the error. We are currently in the process of contacting the relevant sample providers to seek the necessary permissions and will address this matter accordingly. In the meantime, the authors request that this work not be cited as a reference. For any questions or further information, please contact the corresponding author.
